# Supplementary material for: Deriving Information on Play and Playfulness of 3–5-Year-Olds from Short Written Descriptions: Analyzing the Frequency of Usage of Indicators of Playfulness and Their Associations with Maternal Playfulness
Source: MDPI journal article supplement (doi:10.3390/bs12100385), 2022-10-08
Supplement: s1 [file s1]

Table S1

*Distributions and statistics of mothers' self-reported playfulness across socioemotional features of children and mothers*

|                                  | Mothers' self-reported playfulness |                   |                          |                   |                   |
|----------------------------------|------------------------------------|-------------------|--------------------------|-------------------|-------------------|
|                                  | <b>O</b>                           | <b>L</b>          | <b>I</b>                 | <b>W</b>          | <b>SMAP</b>       |
|                                  | <i>M (SD)</i>                      | <i>M (SD)</i>     | <i>M (SD)</i>            | <i>M (SD)</i>     | <i>M (SD)</i>     |
| <b>Sociodemographic features</b> |                                    |                   |                          |                   |                   |
| <i>Child's gender</i>            |                                    |                   |                          |                   |                   |
| Female                           | 4.65 (0.90)                        | 4.03 (1.02)       | 3.59 (1.12)              | 3.95 (1.05)       | 3.96 (1.22)       |
| Male                             | 4.56 (1.03)                        | 3.82 (0.92)       | 3.49 (1.02)              | 3.81 (0.89)       | 3.88 (1.24)       |
| <b><i>t(df); p</i></b>           | 0.66(206); .51                     | 1.56(206); .12    | 0.68(206); .50           | 1.06(206); .29    | 0.47(206); .64    |
| <i>Child's age</i>               |                                    |                   |                          |                   |                   |
| 3                                | 4.58 (1.03)                        | 3.89 (1.02)       | 3.45 (1.02)              | 3.81 (1.00)       | 3.91 (1.25)       |
| 4                                | 4.59 (0.93)                        | 3.93 (0.95)       | 3.65 (1.18)              | 3.90 (0.97)       | 3.86 (1.29)       |
| 5                                | 4.64 (0.97)                        | 3.90 (0.93)       | 3.51 (1.01)              | 3.92 (0.92)       | 3.98 (1.16)       |
| <b><i>F(df); p</i></b>           | 0.06 (2,205); .94                  | 0.03 (2,205); .97 | 0.65 (2,205); .53        | 0.27 (2,205); .76 | 0.15(2, 205); .86 |
| <i>Child's siblings</i>          |                                    |                   |                          |                   |                   |
| 0                                | 4.68 (0.81)                        | 3.79 (1.00)       | 3.59 (0.98)              | 3.86 (0.89)       | 3.97 (1.15)       |
| 1                                | 4.49 (1.11)                        | 3.85 (0.94)       | 3.32 (1.07) <sup>a</sup> | 3.75 (0.98)       | 3.85 (1.33)       |
| 2                                | 4.60 (1.02)                        | 4.13 (0.96)       | 3.77 (1.18)              | 4.00 (0.97)       | 3.98 (1.21)       |
| 3-4                              | 4.97 (0.58)                        | 4.54 (0.59)       | 4.11 (0.97)              | 4.60 (1.12)       | 3.82 (1.31)       |
| <b><i>F(df); p</i></b>           | 0.99(3,204); .40                   | 2.47(3,204); .06  | <b>3.05(3,204); .04</b>  | 2.43(3,204); .67  | 0.19(3, 204); .91 |
| <i>Mothers' age</i>              |                                    |                   |                          |                   |                   |
| <b><i>R; p</i></b>               | <b>-.20; .00</b>                   | -.03; .66         | .01; .87                 | <b>-.15; .03</b>  | <b>-.23; .00</b>  |

|                                       |                 |                       |                  |                  |                       |                   |
|---------------------------------------|-----------------|-----------------------|------------------|------------------|-----------------------|-------------------|
| <i>Mothers' family status</i>         |                 |                       |                  |                  |                       |                   |
| Single/separated                      |                 | 4.94 (0.70)           | 4.02 (0.89)      | 3.71 (0.94)      | 4.39 (0.73)           | 4.32 (1.14)       |
| Relationship/married                  |                 | 4.56 (1.00)           | 3.89 (0.98)      | 3.51 (1.08)      | 3.81 (0.97)           | 3.87 (1.24)       |
|                                       | <b>t(df); p</b> | <b>2.36(206); .02</b> | 0.60(206); .55   | 0.86(206); .39   | <b>2.80(206); .01</b> | 1.68(206); .10    |
| <i>Mother's educational level</i>     |                 |                       |                  |                  |                       |                   |
| No degree/lower school tracks         |                 | 4.76 (0.91)           | 4.00 (0.83)      | 3.36 (1.15)      | 3.93 (0.92)           | 4.00 (1.45)       |
| A-levels                              |                 | 4.54 (0.98)           | 3.63 (0.99)      | 3.58 (0.98)      | 3.68 (0.98)           | 3.90 (1.13)       |
| University degree                     |                 | 4.60 (1.01)           | 3.90 (1.03)      | 3.62 (1.12)      | 3.91 (0.95)           | 3.85 (1.21)       |
| Vocational training                   |                 | 4.64 (0.94)           | 4.09 (0.90)      | 3.50 (0.97)      | 3.87 (1.00)           | 4.12 (1.18)       |
|                                       | <b>F(df); p</b> | 0.24(3,192); .87      | 1.42(3,192); .24 | 0.42(3,192); .74 | 0.45(3,192); .72      | 0.56(3, 192); .64 |
| <i>Mothers' time spent with child</i> |                 |                       |                  |                  |                       |                   |
|                                       | <b>r, p</b>     | .00, .96              | .13; .07         | -.06; .36        | .04; .53              | .07; .31          |

*Note.* *N* = 208 mothers. <sup>a</sup> Post-hoc tests (LSD ) revealed significant lower scores for group 1 siblings compared to the groups of 2 siblings and 3-4 siblings. SMAP (Short Measure of Adult Playfulness) = Global Playfulness. O = Other-directed. L = Lighthearted. I = Intellectual. W = Whimsical. Higher scores indicate higher endorsement.
